# Supplementary material for: Prenatal diagnosis of bilobate placenta: incidence, risk factors and impact on pregnancy outcomes
Source: publisher site journal article supplement (doi:10.1515/jpm-2023-0122), 2023-08-07
Supplement: Supplementary file 2 [file j_jpm-2023-0122_suppl_001.docx]

**Supplementary Table 1.** Univariate analysis regarding preeclampsia.

|  | | **Univariate analysis** | | |
| --- | --- | --- | --- | --- |
| Variables | | OR | 95% CI | p-Value |
| Maternal age (years) | | 1.065 | 1.045, 1.085 | 0.001a |
| ΒΜΙ (kg/m2) | | 1.112 | 1.095, 1.130 | 0.001a |
| No smoking | ref | | | |
| Quit smoking | | 1.471 | 1.193, 1.815 | 0.001a |
| Current smoking | | 1.747 | 1.328, 2.299 | 0.001a |
| Multiparity | | 1.013 | 0.838, 1.223 | 0.896 |
| ART | | 2.181 | 1.562, 3.044 | 0.001a |
| UtA PI z-score | | 1.095 | 1.008, 1.190 | 0.032a |
| Bleeding in 1st trimester | | 1.933 | 1.378, 2.712 | 0.001a |
| Previous history of 1st trim miscarriage | | 1.348 | 1.066, 1.705 | 0.013a |
| Previous history of PTD | | 1.452 | 0.858, 2.457 | 0.165 |
| Abnormal cord insertion | | 1.166 | 0.869, 1.563 | 0.306 |
| Bilobate placenta | | 1.922 | 1.144, 3.229 | 0.014a |

aOR, adjusted Odds Ratio; ART, assisted reproductive technology; CI, confidence intervals; OR, Odds Ratio; PTD, preterm delivery; UtA PI, uterine artery pulsatility index. a Denotes statistical significance.

**Supplementary Table 2.** Univariate analysis regarding small for gestational age neonates.

|  | **Univariate analysis** | | | |
| --- | --- | --- | --- | --- |
| Variables | OR | | 95% CI | p-Value |
| Maternal age (years) | 0.998 | | 0.985, 1.011 | 0.785 |
|
| ΒΜΙ (kg/m2) | 0.959 | | 0.944, 0.974 | 0.001a |
| No smoking | | ref | | |
| Quit smoking | 0.944 | | 0.805, 1.107 | 0.478 |
| Current Smoking | 1.641 | | 1.349, 1.996 | 0.001a |
| Multiparity | 0.680 | | 0.591, 0.782 | 0.001a |
| ART | 1.122 | | 0.832, 1.514 | 0.451 |
| UtA PI z-score | 1.547 | | 1.459, 1.642 | 0.001a |
| Bleeding in 1st trim. | 0.956 | | 0.704, 1.300 | 0.775 |
| Previous history of 1st trim miscarriage | 1.087 | | 0.910, 1.298 | 0.359 |
| Previous history of PTD | 1.191 | | 0.791, 1.794 | 0.402 |
| Abnormal cord insertion | 1.340 | | 1.093, 1.643 | 0.005a |
| Bilobate placenta | 1.234 | | 0.794, 1.919 | 0.350 |

aOR, adjusted Odds Ratio; ART, assisted reproductive technology; CI, confidence intervals; OR, Odds Ratio; PTD, preterm delivery; UtA PI, uterine artery pulsatility index. a Denotes statistical significance.

**Supplementary Table 3.** Univariate analysis regarding preterm delivery.

|  | | **Univariate analysis** | | |
| --- | --- | --- | --- | --- |
| Variables | | OR | 95% CI | p-Value |
| Maternal age (years) | | 1.017 | 0.999, 1.035 | 0.058 |
| ΒΜΙ (kg/m2) | | 1.029 | 1.011, 1.047 | 0.001a |
| No smoking | ref | | | |
| Quit smoking | | 1.118 | 0.910, 1.374 | 0.287 |
| Current smoking | | 1.367 | 1.043, 1.793 | 0.023a |
| Multiparity | | 1.054 | 0.881, 1.261 | 0.566 |
| ART | | 2.144 | 1.555, 2.958 | 0.001a |
| UtA PI z-score | | 1.573 | 1.458, 1.696 | 0.001a |
| Bleeding in 1st trim. | | 1.316 | 0.912, 1.900 | 0.142 |
| Previous history of 1st trim miscarriage | | 1.391 | 1.113, 1.737 | 0.004a |
| Previous history of PTD | | 4.874 | 3.403, 6.980 | 0.001a |
| Abnormal cord insertion | | 1.425 | 1.096, 1.853 | 0.008a |
| Bilobate placenta | | 1.814 | 1.094, 3.009 | 0.021a |

aOR, adjusted Odds Ratio; ART, assisted reproductive technology; CI, confidence intervals; OR, Odds Ratio; PTD, preterm delivery; UtA PI, uterine artery pulsatility. a Denotes statistical significance.

**Supplementary Table 4.** Univariate analysis regarding gestational age at delivery.

|  | **Univariate analysis** | | | |
| --- | --- | --- | --- | --- |
| Variables | β | | 95% CI | p-Value |
| Maternal age (years) | -0.023 | | -0.031, -0.015 | 0.001a |
|
| ΒΜΙ (kg/m2) | 1.029 | | 1.011, 1.047 | 0.001a |
| No smoking | | ref | | |
| Quit smoking | -0.117 | | -0.212, -0.023 | 0.015a |
| Current smoking | -0.237 | | -0.371, -0.103 | 0.001a |
| Multiparity | -0.208 | | -0.291, -0.126 | 0.001a |
| ART | -0.817 | | -1.006, -0.628 | 0.001a |
| UtA PI z-score | -0.213 | | -0.250, -0.177 | 0.001a |
| Bleeding in 1st trim. | -0.378 | | -0.563, -0.193 | 0.001a |
| Previous history of 1st trim miscarriage | -0.234 | | -0.345, -0.123 | 0.001a |
| Previous history of PTD | -1.304 | | -1.567, -1.041 | 0.001a |
| Abnormal cord insertion | -0.225 | | -0.359, -0.091 | 0.001a |
| Bilobate placenta | -0.712 | | -1.001, -0.424 | 0.001a |

β, regression coefficient; ART, assisted reproductive technology; CI, confidence intervals; PTD, preterm delivery; UtA PI, uterine artery pulsatility. a Denotes statistical significance.
